# Supplementary material
Source: PubMed Central journal article supplement (PMC3864244)
Supplement: es402065a_si_001.pdf [file es402065a_si_001.pdf]

# The Read-Across Hypothesis and Environmental Risk Assessment of Pharmaceuticals

*Mariann Rand-Weaver,<sup>†</sup> Luigi Margiotta-Casaluci,<sup>‡</sup> Alpa Patel,<sup>†,‡</sup> Grace H. Panter,<sup>§</sup>*

*Stewart F. Owen,<sup>§</sup> and John P. Sumpter<sup>‡</sup>*

<sup>†</sup>Biosciences, School of Health Sciences and Social Care, Brunel University, Uxbridge,  
Middlesex, UB8 3PH, United Kingdom

<sup>‡</sup>Institute for the Environment, Brunel University, Uxbridge, Middlesex, UB8 3PH, United  
Kingdom

<sup>§</sup>AstraZeneca, Brixham Environmental Laboratory, Freshwater Quarry, Brixham, Devon TQ5  
8BA, United Kingdom

## **Supporting Information**

Three tables, 16 pages.

Table S1 details the accession numbers of sequences used to construct the phylogenetic tree for 5-alpha reductase. Table S2 collates published laboratory studies to 10 pharmaceuticals that report both measured water and plasma concentrations. Table S3 shows the predicted drug plasma concentration for studies<sup>28,33,36-42,44,45</sup> which observed mode of action related effects, but where drug plasma concentrations were not measured.

**Table S1.** Accession numbers of the 5-alpha reductase protein sequences used for the construction of the phylogenetic tree.

| <b>Common name</b>     | <b>Latin name</b>             | <b>5<math>\alpha</math>-Reductase Type</b> | <b>Accession No.</b> | <b>Database</b> |
|------------------------|-------------------------------|--------------------------------------------|----------------------|-----------------|
| Human                  | <i>Homo sapiens</i>           | 1                                          | NP_001038.1          | NCBI            |
| Human                  | <i>Homo sapiens</i>           | 2                                          | NP_000339            | NCBI            |
| Dog                    | <i>Canis lupus familiaris</i> | 1                                          | XP_535799            | NCBI            |
| Dog                    | <i>Canis lupus familiaris</i> | 2                                          | XP_532922            | NCBI            |
| Mouse                  | <i>Mus musculus</i>           | 1                                          | EDL37018             | NCBI            |
| Mouse                  | <i>Mus musculus</i>           | 2                                          | NP_444418            | NCBI            |
| Rat                    | <i>Rattus norvegicus</i>      | 1                                          | NP_073202            | NCBI            |
| Rat                    | <i>Rattus norvegicus</i>      | 2                                          | NP_058766            | NCBI            |
| African clawed frog    | <i>Xenopus laevis</i>         | 1                                          | NP_001092166         | NCBI            |
| Western clawed frog    | <i>Xenopus tropicalis</i>     | 1                                          | NP_001006841         | NCBI            |
| Western clawed frog    | <i>Xenopus tropicalis</i>     | 2                                          | NP_001017113         | NCBI            |
| Japanese wrinkled frog | <i>Glandirana rugosa</i>      | 1                                          | BAH16707             | NCBI            |
| Zebrafish              | <i>Danio rerio</i>            | 1                                          | AAI64429             | NCBI            |
| Zebrafish              | <i>Danio rerio</i>            | 2                                          | NP_001017703         | NCBI            |
| Medaka                 | <i>Oryzias latipes</i>        | 1                                          | ABQ09262             | NCBI            |
| Medaka                 | <i>Oryzias latipes</i>        | 2                                          | ENSORLP00000015262   | Ensembl         |
| Salmon                 | <i>Salmo salar</i>            | 2                                          | ACI68485             | NCBI            |
| Fugu                   | <i>Takifugu rubripes</i>      | 1                                          | ENSTRUP00000030532   | Ensembl         |
| Stickleback            | <i>Gasterosteus aculeatus</i> | 1                                          | ENSGACP00000011845   | Ensembl         |

|                   |                                      |         |                          |                          |
|-------------------|--------------------------------------|---------|--------------------------|--------------------------|
| Amphioxus         | <i>Branchiostoma belcheri</i>        | Unknown | BAI44851                 | NCBI                     |
| Purple sea urchin | <i>Strongylocentrotus porpuratus</i> | Unknown | SPU_010958               | SpBase                   |
| Great pond snail  | <i>Limnea stagnalis</i>              | Unknown | Translated from ES571494 | NCBI (ESTs)              |
| Owl limpet        | <i>Lottia gigantea</i>               | Unknown | 194080                   | Lottia gigantea Database |
| Nematode          | <i>Caenorhabditis elegans</i>        | Unknown | F42F12.3                 | WormBase                 |
| Nematode          | <i>Caenorhabditis remanei</i>        | Unknown | XP_003101195             | NCBI                     |
| Nematode          | <i>Caenorhabditis brenneri</i>       | Unknown | EGT46677                 | NCBI                     |
| Thale cress       | <i>Arabidopsis thaliana</i>          | Unknown | AT2G38050                | TAIR                     |
| Upland cotton     | <i>Gossypium mexicanum</i>           | Unknown | Q2QDF6                   | UniPortKb                |
| Grape             | <i>Vitis vinifera</i>                | Unknown | D7THB8                   | UniPortKb                |
| Tomato            | <i>Solanum lycopersicum</i>          | Unknown | Q5K2N1                   | UniPortKb                |
| Maize             | <i>Zea mays</i>                      | Unknown | B6TIF9                   | UniPortKb                |
| Rice              | <i>Oryza sativa</i>                  | Unknown | Q53NE6                   | UniPortKb                |

**Table S2.** Published laboratory studies of fish exposed to 10 pharmaceuticals that report measured water and plasma concentrations.

| Pharmaceutical<br>(CAS no.)        | Solvent                                 | Exposure duration                   | Nominal water concentration<br>(µg/L) | Measured water concentration<br>(µg/L) | Measured plasma concentration<br>(ng/mL)                                                                                                            | Species / weight / temperature/ pH                                                                | Reference                                                                                                                                                                   | Human therapeutic range<br>(ng/mL)     |
|------------------------------------|-----------------------------------------|-------------------------------------|---------------------------------------|----------------------------------------|-----------------------------------------------------------------------------------------------------------------------------------------------------|---------------------------------------------------------------------------------------------------|-----------------------------------------------------------------------------------------------------------------------------------------------------------------------------|----------------------------------------|
| Atenolol free base<br>(29122-68-7) | None                                    | 21 days                             | 100; 320; 1000; 3200; 10,000          | Reported as 77.10 to 95.67% of nominal | Males – 4.2; 10.8; 48.6; 52.6; 164.3 ; females >LOQ; 30.1; >LOQ; 108.9; 291.0                                                                       | Fathead minnows /Male 3.28 to 4.34 g; female 1.66 to 2.13 g / 24.93 to 25.06 °C / pH 7.64 to 7.76 | Winter et al., 2008.<br><a href="http://www.sciencedirect.com/science/article/pii/S0166445X07004237">http://www.sciencedirect.com/science/article/pii/S0166445X07004237</a> | A= 100 – 2000                          |
| Carbamazepine<br>(CAS 298-46-4)    | Dimethyl-formamide (0.01 %) CAS 68-12-2 | 7 days (sampled on days 1; 3; 6; 7) | 100                                   | 83                                     | Day 1 = 11,500; day 3 = 2,500; day 6 = 1,000; day 7 = zero ?<br><br><i>? = read from graph, appears that continuous exposure leads to clearance</i> | Channel catfish / NA / 19 ± 2°C                                                                   | Garcia et al., 2012.<br><a href="http://www.sciencedirect.com/science/article/pii/S0147651312002369">http://www.sciencedirect.com/science/article/pii/S0147651312002369</a> | A = 2,000-12,000<br>B = 4,000 – 12,000 |
| Clofibric acid<br>(882-09-7)       | NaOH: final concentration not reported  | 28 days                             | 100; 1000; 10,000                     | 122; 625; 11,000                       | 26 ± 6; 90 ± 31; 2,876 ± 867                                                                                                                        | Female Rainbow trout / 26.90 ± 3.04; 26.81 ± 5.74; 18.21 ± 5.12 g / 15 ± 0.03 °C / pH 7.49        | Owen et al., 2010.<br><a href="http://onlinelibrary.wiley.com/doi/10.1002/etc.351/abstract">http://onlinelibrary.wiley.com/doi/10.1002/etc.351/abstract</a>                 | A= 50,000 - 250,000                    |
| Diclofenac sodium                  | None                                    | 14 days                             | 1; 10; 100                            | 1.6 ± 0.93; 11.5 ± 3.98; 81.5 ± 14.09  | 8?; 60?; 369.5                                                                                                                                      | Rainbow trout / 40 g / 13.0 ± 0.1 °C                                                              | Cuklev et al. 2011.<br><a href="http://onlinelibrary.wiley.com/doi/10.1002/etc.351/abstract">http://onlinelibrary.wiley.com/doi/10.1002/etc.351/abstract</a>                | A = 500 – 3,000<br>B = 500 –           |

|                            |                                       |                      |                                                   |                                                    |                                                                                                                                                                                                   |                                                                                                                     |                                                                                                                                                                               |                                                                   |
|----------------------------|---------------------------------------|----------------------|---------------------------------------------------|----------------------------------------------------|---------------------------------------------------------------------------------------------------------------------------------------------------------------------------------------------------|---------------------------------------------------------------------------------------------------------------------|-------------------------------------------------------------------------------------------------------------------------------------------------------------------------------|-------------------------------------------------------------------|
| (Not supplied)             |                                       |                      |                                                   |                                                    | ? = read from graph                                                                                                                                                                               |                                                                                                                     | <a href="http://www.sciencedirect.com/science/article/pii/S0166445X05000731">0.1002/etc.599/abstract</a>                                                                      | 3,000                                                             |
| Gemfibrozil (Not supplied) | Dimethylsulfoxide 0.0003% final       | 96 hours and 14 days | 1500 or 10,000 for 96h; 1.5 or 1,500 over 14 days | Not reported for 96h; 0.34 and 851.9 after 14 days | >75,000 in all fish after 96h at nominal 1500 and 10,000 µg/L water;<br><br>170 ± 20 and<br><br>78,000 ± 5000 in 1.5 and 1500 over 14 days respectively, with the control unexposed having 16 ± 5 | Male goldfish, <i>Carassius auratus</i> / 25.6 ± 0.8 g 96h and 26.4 ± 0.7 g for 14 days / 18 ± 1°C/ pH Not reported | Mimeault et al., 2005.<br><a href="http://www.sciencedirect.com/science/article/pii/S0166445X05000731">http://www.sciencedirect.com/science/article/pii/S0166445X05000731</a> | B= approx 25,000                                                  |
| Ibuprofen: (15687-27-1)    | DMF; final concentration not reported | 1 and 7 days         | 250                                               | 223.9 ± 6.2                                        | 227.19 ± 35.09 after 1 day; 314.85 ± 55.19 after 7 days                                                                                                                                           | channel catfish ( <i>Ictalurus punctatus</i> )/ ~50g/20°C/ pH not reported                                          | Nallani et al., 2011.<br><a href="http://www.sciencedirect.com/science/article/pii/S0045653511005339">http://www.sciencedirect.com/science/article/pii/S0045653511005339</a>  | A=10,000 – 30,000 with 50,000 in the normal range                 |
| Ketoprofen (Not supplied)  | None                                  | 14 days              | 1; 10; 100                                        | 1.2 ± 0.21; 7.2 ± 2.59; 90.5 ± 32.98               | 0.05 ± 0.02; 0.19 ± 0.08; 0.62 ± 0.49                                                                                                                                                             | Rainbow trout / 39.4 ± 6.6 g /12.9°C                                                                                | Cuklev et al. 2012.<br><a href="http://www.sciencedirect.com/science/article/pii/S0304389412005808">http://www.sciencedirect.com/science/article/pii/S0304389412005808</a>    | A = 1000 – 5000<br><br>B = 1000 – 6000 but up to 20,000 is normal |

|                                            |                                                              |                    |                             |                                                  |                                                                                                                 |                                                                                                                             |                                                                                                                                                                                                                                                                            |                                     |
|--------------------------------------------|--------------------------------------------------------------|--------------------|-----------------------------|--------------------------------------------------|-----------------------------------------------------------------------------------------------------------------|-----------------------------------------------------------------------------------------------------------------------------|----------------------------------------------------------------------------------------------------------------------------------------------------------------------------------------------------------------------------------------------------------------------------|-------------------------------------|
| Norethindrone<br>(68-22-4)                 | Dimethyl-<br>formamide<br><br>0.003% in<br>exposure<br>tanks | 7 days             | 100                         | 82.5 ± 8.5                                       | 1000?<br><br><i>? = read from<br/>graph</i>                                                                     | channel catfish<br>(Ictalurus<br>punctatus)/ 49.9 ±<br>9.7 g / 21.3 ± 0.6 °C/<br>pH 7.4 ± 0.3                               | Nallani et al.,<br>2012.<br><a href="http://rd.springer.com/article/10.1007%2Fs00244-011-9691-x#page-1">http://rd.springer.com/article/10.1007%2Fs00244-011-9691-x#page-1</a>                                                                                              |                                     |
| Propranolol<br>Hydrochloride<br>(318-98-9) | None                                                         | 6; 25; 98<br>hours | 1                           | mean 120 ± 160<br>n=5<br><br>range 990 –<br>1330 | 138.2 ± 42.7;<br>254.4 ± 18.5;<br>385.1 ± 127.7 for<br>6; 25; 98h<br>exposure<br>respectively                   | Female Rainbow<br>trout / NA /15.1 °C/<br>7.4                                                                               | Bartram et al.<br>2012.<br><a href="http://onlinelibrary.wiley.com/doi/10.1002/tox.20684/abstract.jsessionid=274D4E884205EB183F0E38B6D58E6C91.d03t04">http://onlinelibrary.wiley.com/doi/10.1002/tox.20684/abstract.jsessionid=274D4E884205EB183F0E38B6D58E6C91.d03t04</a> | A = 20 – 300<br><br>B = 20 – 300    |
| Propranolol<br>Hydrochloride<br>(318-98-9) | None                                                         | 21 days            | 0.001 to 10                 | 1.3; 8; 78; 970                                  | Males:<br><br>555; 6,050;<br>340,000;<br>15,000,000<br><br>Females:<br><br>690; 8,550;<br>210,000;<br>5,750,000 | Fathead minnows<br>/2.4-5.7g males; 0.8<br>– 2.5g female / 25 ±<br>1 °C                                                     | Giltrow et al.,<br>2009.<br><a href="http://www.sciencedirect.com/science/article/pii/S0166445X0900304X">http://www.sciencedirect.com/science/article/pii/S0166445X0900304X</a>                                                                                            | Cites 146<br>ng/mL in<br>manuscript |
| Propranolol<br>hydrochloride<br>(318-98-9) | None                                                         | 28 days            | 1; 10; 100;<br>1000; 10,000 | 0.92; 10.98;<br>83.77; 1007.81;<br>8,696.71      | 0.94; 3.3 ± 0.4; 16<br>± 7; 280 ± 116;<br>5200 ± 1333                                                           | Female Rainbow<br>trout / 23.66±3.67;<br>23.96±3.64;<br>23.69±3.60;<br>22.33±4.38;<br>16.52±3.87g/ 15 ±<br>0.03 °C / pH 7.4 | Owen et al., 2009.<br><a href="http://www.sciencedirect.com/science/article/pii/S0166445X09001635">http://www.sciencedirect.com/science/article/pii/S0166445X09001635</a>                                                                                                  |                                     |

|                                            |      |         |           |                |                |                                                                    |                                                                                                                                    |                           |
|--------------------------------------------|------|---------|-----------|----------------|----------------|--------------------------------------------------------------------|------------------------------------------------------------------------------------------------------------------------------------|---------------------------|
| Sertraline hydrochloride<br>(Not supplied) | None | 28 days | 3; 10; 30 | 2.8; 9.4; 28.1 | 305; 610; 1927 | Male minnows/<br>Fathead not reported - adult / 25 ± 1 °C / pH 8.5 | Valenti et al., 2012.<br><a href="http://pubs.acs.org/doi/abs/10.1021/es204164b">http://pubs.acs.org/doi/abs/10.1021/es204164b</a> | A= 30 – 200<br>B= 50 -250 |
|--------------------------------------------|------|---------|-----------|----------------|----------------|--------------------------------------------------------------------|------------------------------------------------------------------------------------------------------------------------------------|---------------------------|

Human Therapeutic concentrations from A= Rogenthal R, Krueger M, Koeppl C, Preiss R (1999) Drug levels: Therapeutic and toxic serum / plasma concentrations of common drugs. J Clin Monit 15, 529-554; B= Schulz M, Iwersen-Bergmann S, Andresen H, Schmoldt A (2012) Therapeutic and toxic blood concentrations of nearly 1,000 drugs and other xenobiotics. Critical Care 16:R136

NA = not reported in study

? = data read from figures and are therefore estimates



**Table S3.** Fish steady state plasma concentrations ( $F_{SSPC}$ ) of different pharmaceuticals calculated by using the Fish Plasma Model<sup>1</sup> and the exposure concentrations used in the cited studies. A range of  $H_TPC$  is provided (source reference is in brackets), and two predicted partitioning factors were used for the calculation - Log P (A) and Log  $D_{7.4}$  (B), unless the two values were identical. The predicted  $F_{SSPC}$  are compared to the Human Therapeutic Concentration ( $H_TPC$ ), and the potential conflict with the read across hypothesis is indicated as “Yes, No, or unknown (?)”.

| Drug name                                      | Reference in manuscript | $H_TPC$<br>(ng/mL)      | Partitioning factor                                        | Exposure concentration<br>( $\mu\text{g/L}$ ) | Predicted $F_{SSPC}$<br>(ng/mL) | Ratio $F_{SSPC}/H_TPC$         | Conflict with the Read-Across Hypothesis?                        |
|------------------------------------------------|-------------------------|-------------------------|------------------------------------------------------------|-----------------------------------------------|---------------------------------|--------------------------------|------------------------------------------------------------------|
| Ethinylestradiol<br>(CAS 57-63-6)              | 36                      | 0.011-0.082<br>(RxList) | 4.1<br>ACD/Log P<br>ACD/Log $D_{7.4}$                      | 0.0002                                        | 0.03                            | 0.4-2.7                        | NO                                                               |
|                                                |                         |                         |                                                            | 0.001                                         | 0.13                            | 1.6-11.8                       |                                                                  |
|                                                |                         |                         |                                                            | 0.004*                                        | 0.52                            | 6.3-47.3                       |                                                                  |
|                                                |                         |                         |                                                            | 0.016*                                        | 2.1                             | 25.6-191                       |                                                                  |
|                                                |                         |                         |                                                            | 0.064*                                        | 8.3                             | 101.2-754.5                    |                                                                  |
| Beclomethasone dipropionate<br>(CAS 5534-09-8) | 37                      | 0.78-1.344<br>(RxList)  | 3.63<br>ACD/Log P<br>ACD/Log $D_{7.4}$                     | 0.1*                                          | 5.0                             | 3.7-6.4                        | NO                                                               |
|                                                |                         |                         |                                                            | 1*                                            | 50                              | 37.2-64.1                      |                                                                  |
|                                                |                         |                         |                                                            | 10*                                           | 498                             | 370.5-638.7                    |                                                                  |
| Levonorgestrel<br>(CAS 797-63-7)               | 33                      | 1-14<br>(RxList)        | 3.72 (A)<br>ACD/Log P<br><br>3.37 (B)<br>ACD/Log $D_{7.4}$ | 0.0008*                                       | A: 0.06<br>B: 0.03              | A: 0.004-0.06<br>B: 0.003-0.03 | <i>Underestimated uptake ?</i><br><i>(see Fick et al., 2010)</i> |
|                                                |                         |                         |                                                            | 0.0033*                                       | A: 0.23<br>B: 0.13              | A: 0.02-0.20<br>B: 0.01-0.13   |                                                                  |
|                                                |                         |                         |                                                            | 0.0296*                                       | A: 2.03<br>B: 1.13              | A: 0.15-2.0<br>B: 0.08-1.1     |                                                                  |

|                                       |       |                                    |                                      |         |                       |                                      |                                           |
|---------------------------------------|-------|------------------------------------|--------------------------------------|---------|-----------------------|--------------------------------------|-------------------------------------------|
| Drospirenone<br>(CAS 67392-87-4)      | 33    | 38-70<br>(RxList)                  | 3.63 (A)<br>ACD/Log P                | 0.00033 | A: 13<br>B: 19        | A: 0.2-0.3<br>B: 0.3-0.5             | NO                                        |
|                                       |       |                                    | 3.39 (B)<br>ACD/Log D <sub>7.4</sub> | 0.0065* | A: 383<br>B: 256      | A: 5.5-10.1<br>B: 3.7-6.7            |                                           |
|                                       |       |                                    |                                      | 0.070*  | A: 4121<br>B: 2753    | A: 58.9-108.4<br>B: 39.3-72.5        |                                           |
| Gestodene<br>(CAS 60282-87-3)         | 38    | 2.3-13.4<br>(Dibbelt et al., 1992) | 3.65<br>ACD/Log P                    | 0.001*  | 0.06                  | 0.005-0.03                           | YES ?                                     |
|                                       |       |                                    | ACD/Log D <sub>7.4</sub>             | 0.01    | 0.6                   | 0.05-0.26                            | Lack of effects at the<br>medium conc. →  |
|                                       |       |                                    |                                      | 0.1*    | 6                     | 0.45-2.6                             | LOEC require<br>replication.              |
| Desogestrel<br>(CAS 54024-22-5)       | 38    | 2.2-4.1<br>(RxList)                | 5.35<br>ACD/Log P                    | 0.1     | 106                   | 25.9-48.2                            | NO                                        |
|                                       |       |                                    | ACD/Log D <sub>7.4</sub>             | 1       | 1060                  | 258.5-481.8                          |                                           |
|                                       |       |                                    |                                      | 10*     | 10605                 | 2586.6-4820.5                        |                                           |
| Tamoxifen citrate<br>(CAS 54965-24-1) | 39,40 | 40-183<br>(DailyMed)               | 7.882 (A)<br>ACD/LogP                | 0.18    | A: 13463<br>B: 1509   | A: 73.6-336.6<br>B: 8.3-37.7         | ?<br><br>Possible<br>overestimated uptake |
|                                       |       |                                    | 6.58 (B)<br>ACD/Log D <sub>7.4</sub> | 0.56    | A: 41884<br>B: 4694   | A: 228.9-1047.1<br>B: 25.6-117.4     |                                           |
|                                       |       |                                    |                                      | 1.8     | A: 134627<br>B: 15089 | A: 735.8-3365.7<br>B: 82.5-377.2     |                                           |
|                                       |       |                                    |                                      | 5.6*    | A: 418840<br>B: 46945 | A: 2288.7-10471.0<br>B: 256.5-1173.6 |                                           |

|                                  |    |                                                                               |                                      |        |                         |                                    |    |
|----------------------------------|----|-------------------------------------------------------------------------------|--------------------------------------|--------|-------------------------|------------------------------------|----|
|                                  |    |                                                                               |                                      | 18*    | A: 1346271<br>B: 150894 | A:7356.7-33656.8<br>B:824.6-3772.4 |    |
| Fadrozole<br>(CAS 102676-31-3)‡  | 41 | 2-10<br><br>(Estimated from Kochak et al., 1993)                              | 1.484 (A)<br>ACD/LogP                | 2*     | A: 3.2<br>B: 2.3        | A: 0.3-1.6<br>B: 0.2-1.2           | NO |
|                                  |    |                                                                               | 1.29 (B)<br>ACD/Log D <sub>7.4</sub> | 10*    | A: 16<br>B: 12          | A: 1.6-8.0<br>B: 1.2-6.0           |    |
|                                  |    |                                                                               |                                      | 50*    | A: 80<br>B: 58          | A: 8.0-40.0<br>B: 5.8-29.0         |    |
| Letrozole<br>(CAS 112809-51-5)   | 42 | 13-35.75<br><br>(MHRA, Letrozole Public Assessment Report; Fick et al., 2010) | 1.92<br>ACD/LogP                     | 1      | 3.3                     | 0.1-0.3                            | NO |
|                                  |    |                                                                               | ACD/Log D <sub>7.4</sub>             | 5      | 17                      | 0.5-1.3                            |    |
|                                  |    |                                                                               |                                      | 25*    | 83                      | 2.3-6.4                            |    |
|                                  |    |                                                                               |                                      | 125*   | 415                     | 11.6-32.0                          |    |
|                                  |    |                                                                               | 625*                                 | 2077   | 58.1-160.0              |                                    |    |
| Fluoxetine<br>(CAS 56296-78-7) ‡ | 44 | 97-302<br><br>(Amsterdam et al., 1997)                                        | 4.09 (A)<br>ACD/Log P                | 23.2*  | A: 2959<br>B: 42        | A: 9.8-30.5<br>B: 0.14-0.4         | NO |
|                                  |    |                                                                               | 1.56 (B)<br>ACD/Log D <sub>7.4</sub> | 51.4*  | A: 6569<br>B: 94        | A: 21.8-67.7<br>B: 0.3-1.0         |    |
|                                  |    |                                                                               |                                      | 101.9* | A: 12998<br>B: 185      | A: 43.0-134.0<br>B: 0.6-1.9        |    |
| Citalopram                       | 45 | 25-88                                                                         | 3.48 (A)                             | 1      | A: 46                   | A: 0.5-1.8                         | NO |

|                              |      |                                 |                            |      |                   |                             |      |
|------------------------------|------|---------------------------------|----------------------------|------|-------------------|-----------------------------|------|
| (CAS 59729-33-8) ‡           |      | (de Mendoca Lima et al., 2005)  | ACD/Log P                  |      | B: 1.3            | B: 0.015-0.03               |      |
|                              |      |                                 | 1.35 (B)                   | 10   | A: 458<br>B: 13   | A: 5.2-18.3<br>B: 0.15-0.5  |      |
|                              |      |                                 | ACD/Log D <sub>7.4</sub>   | 100  | A: 4575<br>B: 127 | A: 52.0-183.0<br>B: 1.4-5.1 |      |
| Oxazepam<br>(CAS 604-75-1) ‡ | 28   | 263-510<br>(Smink et al., 2008) | 2.01 (A)                   | 1.8* | A: 7              | A: 0.015-0.03               | YES? |
|                              |      |                                 | ACD/Log P                  |      | B: 10             | B: 0.02-0.04                |      |
| 2.21 (B)                     | 910* | A: 3518<br>B: 5008              | A: 6.9-13.4<br>B: 9.8-19.0 |      |                   |                             |      |
|                              |      |                                 | ACD/Log D <sub>7.4</sub>   |      |                   |                             |      |

‡ CAS not provided in the paper. \* Effect concentrations for the most relevant endpoint.

### Comments

We used the Fish Plasma Model<sup>1</sup> (FPM) to predict if the exposure concentrations used in the studies cited would produce a F<sub>SS</sub>PC below or above the H<sub>7</sub>PC; furthermore, we then related the predictions with the concentrations at which effects on the most relevant endpoints were observed.

The accuracy of the FPM has not yet been fully experimentally validated; therefore, a degree of uncertainty exists with respect to its range of applicability. Since the Log K<sub>OW</sub> is the driving factor of the model, the accumulation of some compounds (e.g. highly

lipophilic drugs) may be overestimated. At the same time, the FPM does not consider the role of other factors, such as the presence of steroid hormone binding globulins in the gills, that may increase the uptake rate of pharmaceuticals from the surrounding water (i.e. steroids). The  $\text{Log } D_{7.4}$  itself may be a source of uncertainty, since an experimental value is unavailable for the vast majority of compounds; hence, a computationally estimated value is used, carrying an intrinsic computational method error. Further sources of uncertainty may also be represented by: small differences of pH in the exposure system, which may in some cases affect the actual  $\text{Log } K_{OW}$ ; differences in the Area Under the Curve (AUC) for fish and humans with equal  $C_{max}$ ; differences between the duration of fish exposure and human treatment; lack of replicated experiments that reproduce the effects at the lowest concentrations.

Using the FPM and considering the uncertainties described above, the predictions for 8 out of 12 pharmaceuticals are not in conflict with the read-across hypothesis. These compounds had an effect at concentrations that are predicted to produce  $F_{SSPC}$  equal or higher to the relative  $H_TPC$ . The reliability of the predictions for 2 out of 12 compounds were identified as “unknown”, since the FPM is believed to overestimate (i.e. tamoxifen citrate) or underestimate (i.e. levonorgestrel) the uptake of the compound from the water via the gills. In the case of tamoxifen citrate the predictions do not disprove the hypothesis (effects occurring only when  $F_{SSPC} > 250$ -fold  $H_TPC$ ), however the very high  $\text{Log } D_{7.4}$  of this compound (6.58) may generate a significant overestimation of the predicted plasma accumulation. On the other hand, the predictions for levonorgestrel apparently disprove the hypothesis (the LOEC produces a  $F_{SSPC} \ll H_TPC$ ); however, a strong discrepancy has been demonstrated between the predicted plasma bioconcentration factor (36-68) and the experimental one (8500-12000) (Fick et al., 2010).<sup>13</sup> This discrepancy indicates that the model may significantly underestimate the uptake of levonorgestrel from the surrounding water.

Only the predictions for gestodene and oxazepam apparently disprove the read-across hypothesis. In both cases the LOEC would produce  $F_{SSPC} \ll H_TPC$ . In the first case, Runnals et al. (2013)<sup>38</sup> observed reproductive effects only at the lowest and highest concentrations, but not at the intermediate one. This indicates that the effects observed at the lowest concentration will need to be replicated in order to properly interpret the results. If the high effect concentration is used as the LOEC, then the predictions fully support the read-across hypothesis. A similar situation occurs with oxazepam, where fish were exposed at two concentrations of oxazepam (1.8 and 910  $\mu\text{g/L}$ ), and effects were observed at both concentrations. The effects observed at the highest concentrations would fit with the read-across hypothesis (producing a  $F_{SSPC}$  equal to 7-19-fold the  $H_TPC$ ), whereas effects observed at the lowest concentration would, if replicated, disprove it. In this case, the experimental design of the study prevents a proper interpretation of the results: only two concentrations were used, and there is a 505-fold difference between them (a factor of 3.2 up to 100-fold difference between concentrations is generally used to establish a dose response). For both gestodene and oxazepam, only the replication of the effects observed at the lowest concentrations will clarify if these compounds represent exceptions of the hypothesis that human pharmaceuticals elicit mode of action-related effects in fish only if the  $F_{SSPC}$  is equal or above the  $H_TPC$ .

In conclusion, the predictions obtained by the FPM indicate that the results obtained for the 12 pharmaceuticals discussed above do not disprove the read-across hypothesis, with the possible exceptions of gestodene and oxazepam; however, the LOECs reported for these two compounds have not yet been replicated, and only additional experiments will clarify the observed discrepancies.

The FPM is considered to be a useful tool that can be used to guide the experimental design, the selection of the exposure concentrations and the definition of the environmental risk. However, the FPM output should be carefully evaluated to avoid significant misinterpretations of the predictions.

## References

Superscripted references are those contained in the manuscript.

### Additional references

Amsterdam, J. D., Fawcett, J., Quitkin, F. M., Reimherr, F. W., Rosenbaum, J. F., Michelson, D., Hornig-Rohan, M., Beasley, C. M.

Fluoxetine and norfluoxetine plasma concentrations in major depression: a multicenter study. *Am. J. Psych.*, **1997**, 154, 963–969.

De Mendonça Lima, C. A., Baumann, P., Brawand-Amey, M., Brogli, C., Jacquet, S., Cochard, N., Powell-Golay, K., Eap, C. B.

Effect of age and gender on citalopram and desmethylcitalopram steady-state plasma concentrations in adults and elderly depressed patients. *Prog. Neuropsychopharmacol Biol. Psychiatry*, **2005**, 29, 952–956.

Dibbelt, L., Knuppen, R., Kuhn, W., Jütting, G. Pharmacokinetics and protein binding of gestodene under treatment with a low-dose combination oral contraceptive for three months. *Drug. Res.*, **1992**, 42:1146–1152.

Kochak, G. M., Choi, R. L., & Entwistle, E. A. Dose Proportionality and Population Characteristics of Oral Fadrozole Hydrochloride, an Aromatase Inhibitor, in Postmenopausal Women. *Pharmaceut. Res.*, **1993**, 10, 1760–1764.

MHRA Public Assessment Report, Letrozole 2.5 mg Film-Coated Tablets, PL 00289/1168.

Smink, B. E., Hofman, B. J. A., Dijkhuizen, A., Lushof, K. J., de Gier, J. J., Egberts, A. C. G., Uges, D. R. A. The concentration of oxazepam and oxazepam glucuronide in oral fluid, blood and serum after controlled administration of 15 and 30 mg oxazepam. *Br. J. Clin. Pharmacol.*, **2008**, 66, 556–560.

DailyMed at [www.dailymed.nlm.nih.gov](http://www.dailymed.nlm.nih.gov)

RxList at [www.rxlist.com](http://www.rxlist.com)
